# Supplementary material
Source: publisher figshare collection journal article supplement (https://acs.figshare.com/ndownloader/files/4470094)
Supplement: Supplementary file 1 [file 4470094]

## Supporting information

### Amino Silane Micropatterns on Hydroxyl-Terminated Substrates: Fabrication and Applications

Hai Li,<sup>†</sup> Juan Zhang,<sup>†</sup> Xiaozhu Zhou,<sup>†</sup> Gang Lu,<sup>†</sup> Zongyou Yin,<sup>†</sup> Gongping Li,<sup>#</sup> Tom Wu,<sup>#</sup> Freddy Boey,<sup>†</sup> Subbu S. Venkatraman,<sup>†</sup> and Hua Zhang<sup>†,\*</sup>

<sup>†</sup>School of Materials Science and Engineering, Nanyang Technological University, 50 Nanyang Avenue, Singapore 639798, Singapore

<sup>#</sup>School of Physical and Mathematical Sciences, Nanyang Technological University, 21 Nanyang Link, Singapore 637371, Singapore

\*Author to whom correspondence should be addressed. Tel: +65-67905175. Fax: +65-67909081. E-mail: [h Zhang@ntu.edu.sg](mailto:h Zhang@ntu.edu.sg).

Website: <http://www.ntu.edu.sg/home/h Zhang/>.

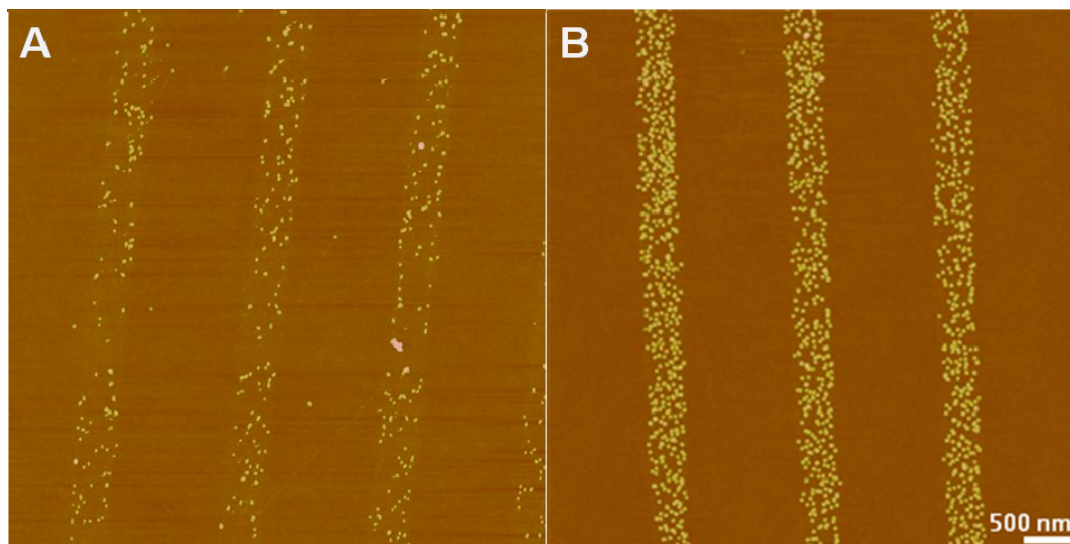

**Figure S1.** AFM images of Au NPs adsorbed on APTES patterns fabricated by  $\mu$ CP on  $\text{SiO}_2$  with different concentration of APTES aqueous solution: (A) 0.2% and (B) 0.5%. The scan size is  $5 \times 5 \mu\text{m}^2$ . Z scale: 50 nm.

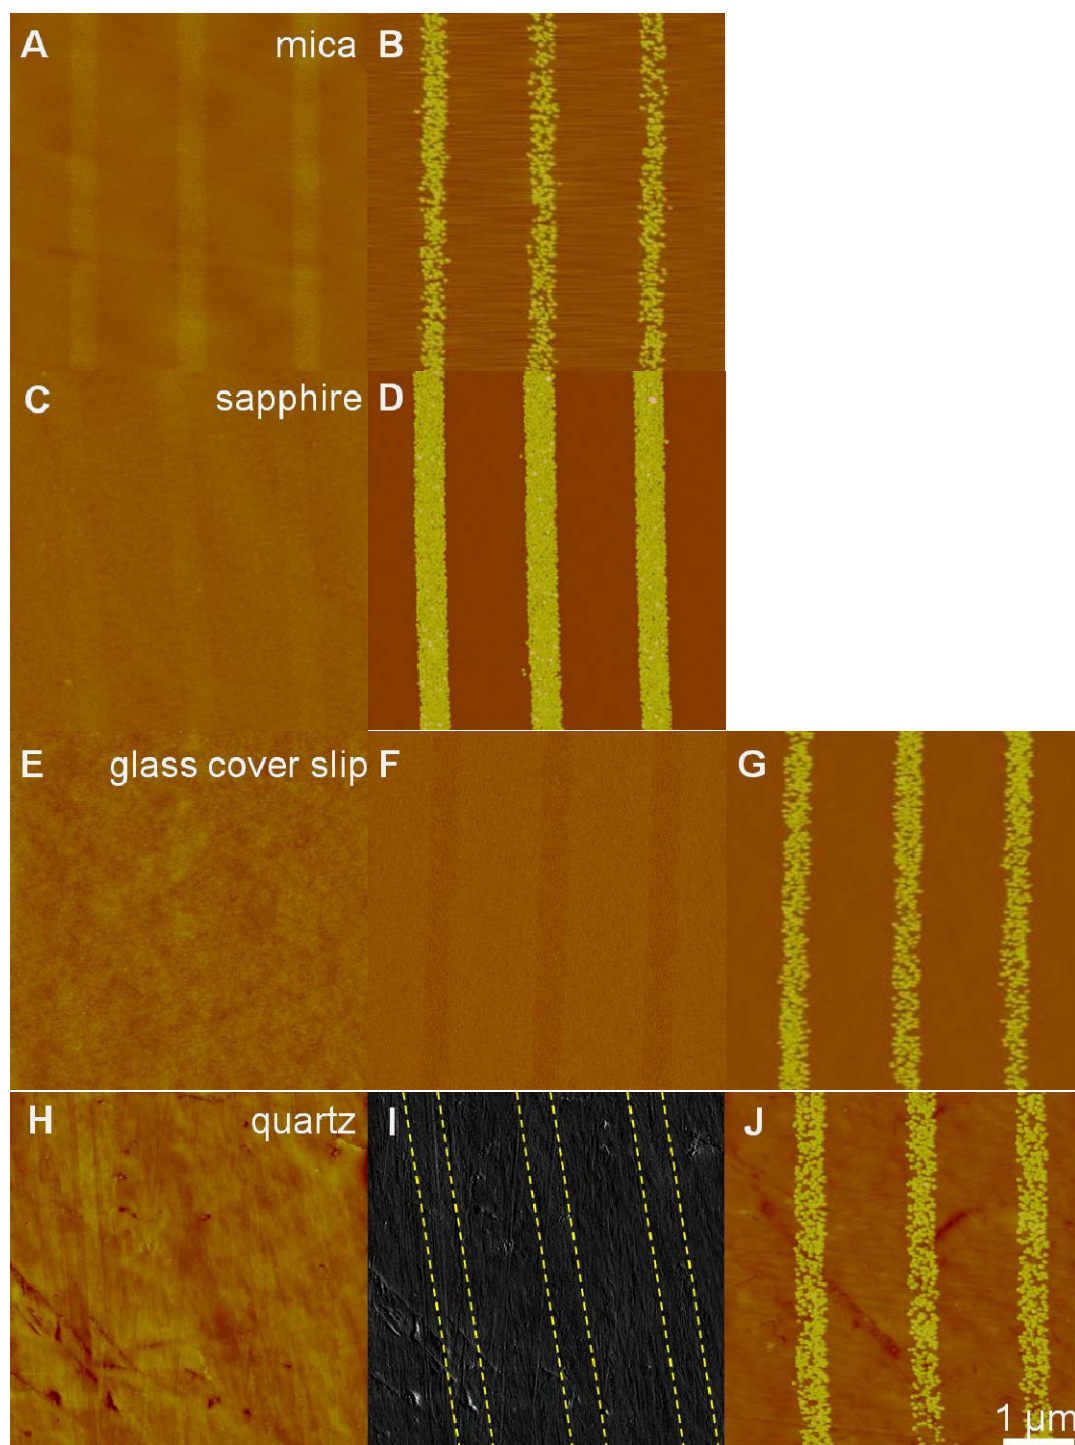

**Figure S2.** AFM topographic (A, C, E, H) and phase images (F, I) of APTES micropatterns generated by  $\mu$ CP on mica (A), sapphire (C), glass cover slip (E-F), and quartz substrates (H-I), respectively, and the adsorption of Au NPs (B, D, G, J). (I) Phase image of (H) shows three APTES patterns between the yellow dash lines. All AFM images are  $5 \times 5 \mu\text{m}^2$ . Z scale: 10 nm in (A, C, E); 30 nm in (H); 50 nm in (B, D, G, J); and  $50^\circ$  in (F, I).

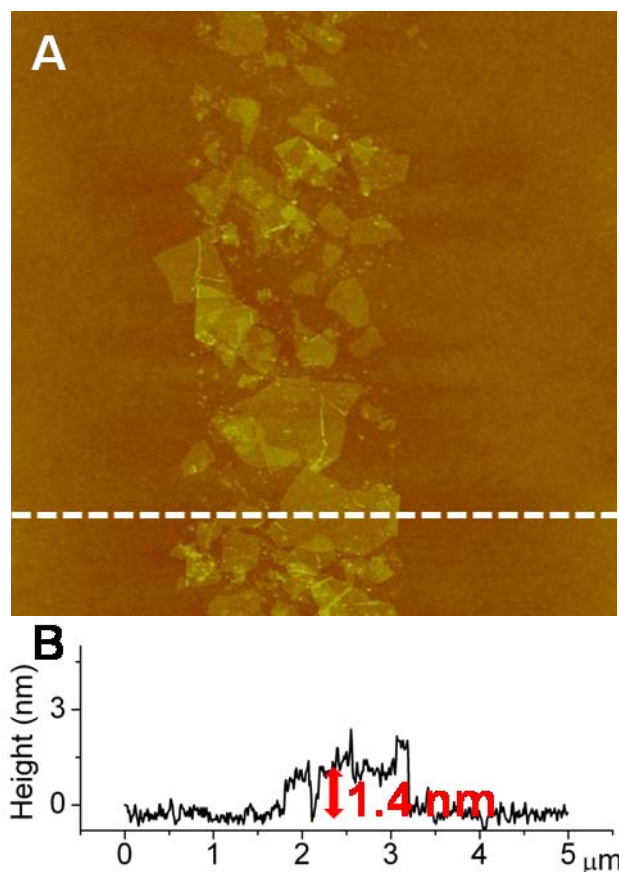

**Figure S3.** AFM image of single-layer graphene oxide (GO) adsorbed on an APTES pattern on SiO<sub>2</sub>. (A) Topographic image; (B) height profile of single-layer GO. The scan size is  $5 \times 5 \mu\text{m}^2$ . Z scale: 20 nm.
